# Supplementary material
Source: publisher figshare collection journal article supplement (https://gsapubs.figshare.com/articles/dataset/_/12676760)
Supplement: Supplementary file 1 [file 1]

Ke Zhao, Xuebin Du, Yongchao Lu, Fang Hao, Zhanhong Liu, and Jixin Jia, 2020, Is volcanic ash responsible for the enrichment of organic carbon in shales? Quantitative characterization of organic-rich shale at the Ordovician-Silurian transition: GSA Bulletin, <https://doi.org/10.1130/B35737.1>.

## Supplemental Material

**Appendix 1.** TOC, major element and trace element analysis results of samples from the Wufeng and Longmaxi formations.

**Appendix 2.** Ash correction calculation results for the study area based on ash data from this and previous studies.

### REFERENCES CITED

- Hu, Y.H., Sun, W.D., Ding, X., Wang, F.Y., Ling, M.X., and Liu, J., 2009, Volcanic event at the Ordovician-Silurian boundary: The message from K-bentonite of Yangtze Block [in Chinese with English abstract]: *Yanshi Xuebao*, v. 25, no. 12, p. 3298–3308.
- Luo, H., Pan, L.K., and He, R.L., 2017, Geochemical Characteristics and Geological Significance of Longmaxi Formation of Late Ordovician-Early Silurian in Mayangzhai Area, Hubei Province [in Chinese with English abstract]: *Resources Environment & Engineering*, v. 31, no. 1, p. 1–5, <https://doi.org/10.16536/j.cnki.issn.1671-1211.2017.01.001>.
- Wang, L.W., Zhang, J.F., Chen, J.H., Zhang, Y.D., Chen, X.Y., Zhu, C.H., Liu, J., Hu, Y.H., and Ma, X., 2015, Characteristics of Katian (late Ordovician) K-bentonites from Anji, Zhejiang Province [in Chinese with English abstract]: *Journal of Stratigraphy*, v. 39, no. 2, p. 155–168.
